# Supplementary material for: Enhanced orbital adipogenesis in a mouse model of T-cell-mediated autoimmunity, zymosan A-treated SKG mice: Implications for Graves’ ophthalmopathy
Source: PubMed Central journal article supplement (PMC7193596; doi:10.1038/s41598-020-64402-9), 2020-04-30
Supplement: 41598_2020_64402_MOESM1_ESM.pdf [file 41598_2020_64402_MOESM1_ESM.pdf]

**Supplementary Information**

**Enhanced orbital adipogenesis in a mouse model of T-cell-mediated autoimmunity,  
zymosan A-treated SKG mice: Implications for Graves' ophthalmopathy**

Sera Park, Dae-Young Park, Jaeryung Kim, Kyung In Woo, Yoon-Duck Kim, Jisang Han,  
Tae-Young Chung, Hoon-Suk Cha, Dong Hui Lim

\*Corresponding author. E-mail: donghui.lim@samsung.com (D.H.L.) and  
hoonsuk.cha@samsung.com (H.-S.C.)

This material includes:

Supplementary Fig. S1. SKG mice showed no significant change in extraocular muscle volume, glycosaminoglycan accumulation, and infiltration of inflammatory cells.

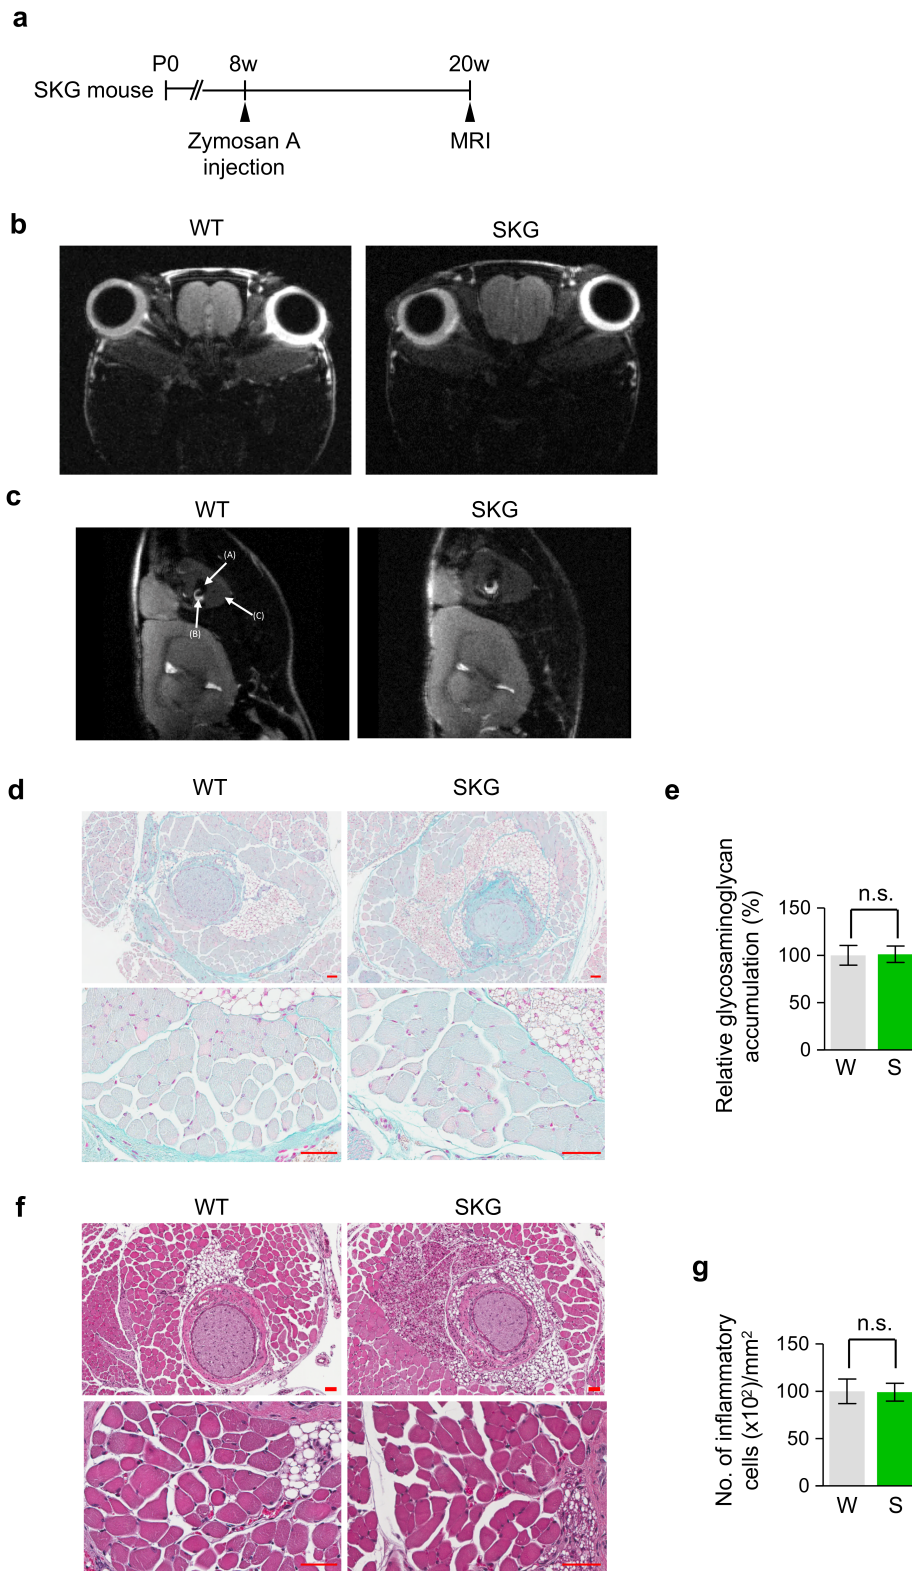

**Supplementary Figure 1. SKG mice showed no significant change in extraocular muscle volume, glycosaminoglycan accumulation, and infiltration of inflammatory cells. (a)**

Diagram of the schedule for an innate immune stimulus by zymosan A administration starting at 8 weeks old and 3 months later using SKG mice. **(b and c)** in vivo MR Images showing the orbital muscles. Extraocular muscle (labelled A), optic nerve (labelled B) and Harderian gland (labelled C). **(d and e)** Images and comparison of the intensity of Alcian blue immunostaining for evaluation of glycosaminoglycan accumulation in the extraocular muscles. **(f and g)** Images and comparison of the infiltration of inflammatory cells in the extraocular muscles. n = 4 for each group. Scale bars: 50  $\mu\text{m}$ .
